# Supplementary material for: Global variation in the prevalence of bullying victimisation amongst adolescents: Role of peer and parental supports
Source: PubMed Central journal article supplement — eClinicalMedicine. 2020 Feb 17;20:100276. doi: 10.1016/j.eclinm.2020.100276 (PMC7152826; doi:10.1016/j.eclinm.2020.100276), 2020-02-17
Supplement: mmc1.pdf [file mmc1.pdf]

### Supplementary Table 1: Items of bullying measurement

---

|                                                             |                                                                  |
|-------------------------------------------------------------|------------------------------------------------------------------|
| During the past 30 days, on how many days were you bullied? | 1. 0 days                                                        |
|                                                             | 2. 1 or 2 days                                                   |
|                                                             | 3. 3 to 5 days                                                   |
|                                                             | 4. 6 to 9 days                                                   |
|                                                             | 5. 10 to 19 days                                                 |
|                                                             | 6. 20 to 29 days                                                 |
|                                                             | 7. All 30 days                                                   |
| During the past 30 days, how were you bullied most Often?   | 1. I was not bullied during the past 30 days                     |
|                                                             | 2. I was hit, kicked, pushed, shoved around, or locked indoors   |
|                                                             | 3. I was made fun of because of my race, nationality, or color   |
|                                                             | 4. I was made fun of because of my religion                      |
|                                                             | 5. I was made fun of with sexual jokes, comments, or gestures    |
|                                                             | 6. I was left out of activities on purpose or completely ignored |
|                                                             | 7. I was made fun of because of how my body or face looks        |
|                                                             | 8. I was bullied in some other way                               |
|                                                             | 9.                                                               |
|                                                             | 10.                                                              |
|                                                             | 11.                                                              |
|                                                             | 12.                                                              |
|                                                             | 13.                                                              |

---

**Supplementary Table 2: Characteristics of the Global School-based Health Surveys by country**

| Country                        | Survey year | Sample size | Response rate (%) |
|--------------------------------|-------------|-------------|-------------------|
| Jordan                         | 2007        | 1876        | 99.8              |
| Algeria                        | 2011        | 4377        | 98                |
| Libya                          | 2007        | 2226        | 98                |
| China                          | 2003        | 10582       | 98                |
| Eswatini                       | 2013        | 3501        | 97                |
| Syrian                         | 2010        | 3,098       | 97                |
| Vietnam                        | 2013        | 3200        | 96                |
| Myanmar                        | 2007        | 2438        | 95                |
| Botswana                       | 2005        | 1842        | 95                |
| Indonesia                      | 2007        | 10363       | 94                |
| Malawi                         | 2009        | 2172        | 94                |
| Oman                           | 2015        | 3327        | 92                |
| Bangladesh                     | 2014        | 2975        | 91                |
| United Arab Emirates           | 2010        | 2456        | 91                |
| British Virgin Islands         | 2009        | 1584        | 90                |
| Trinidad and Tobago            | 2011        | 2693        | 90                |
| Tuvalu                         | 2013        | 875         | 90                |
| Sri-Lanka                      | 2008        | 2363        | 89                |
| Thailand                       | 2008        | 5230        | 89                |
| Namibia                        | 2013        | 4136        | 89                |
| Suriname                       | 2009        | 1619        | 89                |
| Malaysia                       | 2012        | 23992       | 89                |
| Iraq                           | 2012        | 1884        | 88                |
| Belize                         | 2011        | 1957        | 88                |
| Bolivia                        | 2012        | 3445        | 88                |
| El Salvador                    | 2009        | 1829        | 88                |
| Mongolia                       | 2010        | 5200        | 88                |
| Tanzania                       | 2014        | 3576        | 87                |
| Qatar                          | 2011        | 1838        | 87                |
| Egypt                          | 2011        | 2390        | 85                |
| Peru                           | 2010        | 2771        | 85                |
| Cambodia                       | 2013        | 3669        | 85                |
| Kiribati                       | 2012        | 1438        | 85                |
| Solomon Islands                | 2011        | 1278        | 85                |
| Kenya                          | 2003        | 2890        | 84                |
| Anguilla                       | 2009        | 887         | 84                |
| Dominica                       | 2009        | 1544        | 84                |
| St. Vincent and the Grenadines | 2007        | 1176        | 84                |
| Djibouti                       | 2011        | 1359        | 83                |
| Tunisia                        | 2008        | 2465        | 83                |
| Curaçao                        | 2009        | 2689        | 83                |
| Mauritius                      | 2011        | 2084        | 82                |
| Seychelles                     | 2015        | 2335        | 82                |
| Guatemala                      | 2015        | 4082        | 82                |
| Saint Lucia                    | 2007        | 1219        | 82                |
| Wallis and Futuna              | 2015        | 1024        | 82                |
| Niue                           | 2010        | 131         | 81                |
| Mozambique                     | 2015        | 1737        | 80                |
| Tonga                          | 2013        | 2015        | 80                |
| Timor                          | 2015        | 3217        | 79                |
| Afghanistan                    | 2014        | 2358        | 79                |
| Cayman Islands                 | 2007        | 1201        | 79                |
| Honduras                       | 2012        | 1700        | 79                |
| Philippines                    | 2015        | 8394        | 79                |
| Samoa                          | 2011        | 2030        | 79                |
| Bahamas                        | 2013        | 1270        | 78                |
| Grenada                        | 2013        | 1366        | 78                |
| Montserrat                     | 2008        | 203         | 78                |
| Ghana                          | 2007        | 1839        | 76                |
| Pakistan                       | 2009        | 4676        | 76                |
| Guyana                         | 2010        | 2212        | 76                |
| Yemen                          | 2014        | 2476        | 75                |
| Barbados                       | 2011        | 1573        | 73                |
| Nauru                          | 2011        | 499         | 73                |
| Costa Rica                     | 2009        | 2590        | 72                |
| Jamaica                        | 2010        | 1482        | 72                |
| Vanuatu                        | 2011        | 1018        | 72                |
| Argentina                      | 2012        | 26988       | 71                |
| Uruguay                        | 2006        | 3415        | 71                |
| Tokelau                        | 2014        | 132         | 71                |

---

|                                  |      |       |    |
|----------------------------------|------|-------|----|
| Mauritania                       | 2010 | 1898  | 70 |
| Zambia                           | 2004 | 1,641 | 70 |
| Saint Kitts and Nevis            | 2011 | 1652  | 70 |
| Lao People's Democratic Republic | 2015 | 3442  | 70 |
| Uganda                           | 2003 | 2869  | 69 |
| Antigua                          | 2009 | 1208  | 67 |
| Brunei Darussalam                | 2014 | 2514  | 65 |
| Cook Islands                     | 2015 | 669   | 65 |
| Maldives                         | 2009 | 3325  | 60 |
| Chile                            | 2013 | 2001  | 60 |
| Kuwait                           | 2015 | 3304  | 78 |
| Morocco                          | 2010 | 2864  | 92 |

---

**Supplementary Table 3: Country-specific prevalence by gender, age group and socioeconomic status**

| Country                             | Overall | Female   |     | 14-15 years     | 16-17 years | Socioeconomic status- |    |
|-------------------------------------|---------|----------|-----|-----------------|-------------|-----------------------|----|
|                                     | (%)     | Male (%) | (%) | 12-13 years (%) | (%)         | below average (%)     |    |
| <b>Southeast Asia</b>               |         |          |     |                 |             |                       |    |
| Bangladesh                          | 25      | 28       | 18  | 20              | 25          | 34                    | 25 |
| Indonesia                           | 21      | 24       | 17  | 21              | 21          | 18                    | 26 |
| Maldives                            | 27      | 27       | 26  | 30              | 30          | 23                    | 41 |
| Myanmar                             | 21      | 24       | 17  | 20              | 20          | 24                    | 35 |
| Sri-Lanka                           | 38      | 47       | 29  | 37              | 38          | 39                    | 51 |
| Thailand                            | 30      | 36       | 24  | 36              | 30          | 21                    | 40 |
| Timor                               | 28      | 34       | 23  | 33              | 30          | 26                    | 36 |
| <b>African Region</b>               |         |          |     |                 |             |                       |    |
| Algeria                             | 51      | 47       | 55  | 51              | 51          | 52                    |    |
| Botswana                            | 53      | 54       | 53  | 50              | 53          | 55                    | 60 |
| Eswatini                            | 32      | 32       | 31  | 30              | 33          | 32                    | 39 |
| Ghana                               | 48      | 47       | 51  | 17              | 55          | 48                    | 57 |
| Kenya                               | 57      | 57       | 57  | 63              | 56          | 52                    | 63 |
| Malawi                              | 45      | 44       | 46  | 50              | 43          | 74                    | 52 |
| Mauritania                          | 45      | 47       | 43  | 48              | 47          | 40                    | 53 |
| Mauritius                           | 35      | 42       | 28  | 33              | 37          | 27                    | 44 |
| Mozambique                          | 45      | 45       | 44  | 50              | 44          | 42                    | 49 |
| Namibia                             | 45      | 44       | 46  | 43              | 47          | 45                    | 54 |
| Seychelles                          | 47      | 45       | 48  | 57              | 45          | 28                    | 61 |
| Tanzania                            | 26      | 25       | 27  | 28              | 26          | 23                    | 43 |
| Uganda                              | 46      | 48       | 43  | 48              | 45          | 46                    | 54 |
| Zambia                              | 63      | 60       | 65  | 64              | 66          | 58                    | 65 |
| <b>Eastern Mediterranean Region</b> |         |          |     |                 |             |                       |    |
| Afghanistan                         | 43      | 42       | 42  | 42              | 44          | 41                    | 53 |
| Djibouti                            | 42      | 43       | 40  | 38              | 41          | 44                    | 51 |
| Egypt                               | 69      | 69       | 69  | 71              | 69          | 43                    | 73 |
| Iraq                                | 29      | 32       | 24  | 33              | 26          | 30                    | 41 |
| Jordan                              | 42      | 47       | 37  | 40              | 42          | 42                    | 55 |
| Kuwait                              | 30      | 33       | 28  | 32              | 31          | 29                    | 41 |
| Libya                               | 35      | 40       | 31  | 36              | 35          | 35                    | 39 |
| Morocco                             | 19      | 17       | 21  | 17              | 20          | 21                    | 32 |
| Oman                                | 43      | 44       | 41  | 45              | 41          | 43                    | 56 |
| Pakistan                            | 41      | 45       | 35  | 38              | 42          | 44                    | 51 |
| Qatar                               | 42      | 50       | 35  | 40              | 44          | 52                    | 57 |
| Tunisia                             | 31      | 37       | 26  | 31              | 30          | 33                    | 44 |
| United Arab Emirates                | 23      | 26       | 21  | 23              | 22          | 27                    | 34 |
| Yemen                               | 40      | 47       | 31  | 45              | 41          | 35                    | 49 |
| <b>Region of the America</b>        |         |          |     |                 |             |                       |    |
| Anguilla                            | 25      | 24       | 26  | 34              | 25          | 16                    | 32 |
| Antigua                             | 25      | 23       | 27  | 28              | 23          | 15                    | 38 |
| Argentina                           | 24      | 24       | 23  | 25              | 24          | 21                    | 36 |
| Bahamas                             | 24      | 24       | 22  | 25              | 23          | 19                    | 31 |
| Barbados                            | 13      | 15       | 10  | 17              | 12          | 3                     | 18 |
| Belize                              | 30      | 31       | 30  | 30              | 31          | 29                    | 45 |
| Bolivia                             | 32      | 32       | 30  | 29              | 31          | 35                    | 43 |
| British Virgin Islands              | 18      | 18       | 18  | 19              | 18          | 17                    | 22 |
| Cayman Islands                      | 25      | 24       | 27  | 30              | 24          | 17                    | 37 |
| Chile                               | 13      | 14       | 11  | 15              | 15          | 9                     | 22 |
| Costa Rica                          | 19      | 19       | 19  | 18              | 20          | 18                    | 41 |
| Curaçao                             | 27      | 28       | 26  | 29              | 26          | 27                    | 44 |
| Dominica                            | 26      | 26       | 26  | 27              | 27          | 22                    | 37 |
| El Salvador                         | 22      | 21       | 24  | 25              | 22          | 22                    | 43 |
| Grenada                             | 29      | 31       | 27  | 28              | 27          | 35                    | 43 |
| Guatemala                           | 24      | 26       | 21  | 24              | 23          | 27                    | 42 |
| Guyana                              | 37      | 38       | 36  | 40              | 38          | 29                    | 54 |
| Honduras                            | 32      | 31       | 32  | 34              | 31          | 28                    | 46 |
| Jamaica                             | 42      | 43       | 39  | 45              | 39          | 44                    | 53 |
| Montserrat                          | 25      | 28       | 22  | 26              | 28          | 16                    |    |
| Peru                                | 48      | 46       | 49  | 45              | 48          | 48                    | 63 |
| Saint Kitts and Nevis               | 22      | 24       | 19  | 25              | 22          | 17                    | 34 |
| Saint Lucia                         | 26      | 27       | 26  | 29              | 23          | 28                    | 38 |
| St. Vincent and the Grenadines      | 30      | 31       | 28  | 33              | 27          | 28                    | 42 |
| Suriname                            | 27      | 27       | 26  | 29              | 25          | 28                    | 35 |
| Trinidad and Tobago                 | 15      | 17       | 12  | 12              | 17          | 13                    | 19 |
| Uruguay                             | 19      | 17       | 20  | 21              | 18          | 16                    | 29 |
| <b>Western Pacific Region</b>       |         |          |     |                 |             |                       |    |

|                                     |    |    |    |    |    |    |    |
|-------------------------------------|----|----|----|----|----|----|----|
| Brunei Darussalam                   | 21 | 22 | 20 | 28 | 21 | 15 | 27 |
| Cambodia                            | 22 | 22 | 22 | 20 | 23 | 22 | 32 |
| Cook Islands                        | 27 | 26 | 27 | 47 | 27 | 21 | 35 |
| Kiribati                            | 36 | 41 | 32 | 38 | 36 | 30 | 42 |
| Lao People's<br>Democratic Republic | 12 | 12 | 12 | 19 | 12 | 11 | 16 |
| Malaysia                            | 18 | 20 | 16 | 24 | 19 | 12 | 23 |
| Mongolia                            | 28 | 34 | 22 | 33 | 30 | 20 | 40 |
| Nauru                               | 33 | 36 | 30 | 37 | 41 | 15 | 38 |
| Niue                                | 31 | 30 | 31 | 43 | 38 | 13 | 44 |
| Philippines                         | 49 | 51 | 48 | 52 | 51 | 42 | 58 |
| Samoa                               | 75 | 79 | 70 | 75 | 74 | 81 | 77 |
| Solomon Islands                     | 67 | 64 | 68 | 62 | 67 | 68 | 69 |
| Tokelau                             | 36 | 34 | 35 | 51 | 31 | 16 | 52 |
| Tonga                               | 51 | 50 | 53 | 53 | 50 | 56 | 62 |
| Tuvalu                              | 26 | 35 | 18 | 33 | 27 | 15 | 35 |
| Vanuatu                             | 67 | 68 | 66 | 69 | 67 | 62 | 72 |
| Vietnam                             | 23 | 23 | 24 | 0  | 26 | 21 | 31 |
| Wallis and Futuna                   | 30 | 30 | 30 | 34 | 30 | 26 | 32 |
| China                               | 24 | 26 | 21 | 23 | 24 | 21 | 38 |
| <b>European Region</b>              |    |    |    |    |    |    |    |
| Tajikistan                          | 7  | 7  | 8  | 11 | 7  | 7  | 7  |
| Macedonia                           | 10 | 10 | 10 | 9  | 10 | 11 | 23 |

**Supplementary Table 4: Country specific prevalence by peer support**

| Country                             | Peers were supportive |               |                       |            |
|-------------------------------------|-----------------------|---------------|-----------------------|------------|
|                                     | Never/rarely (%)      | Sometimes (%) | Most of the times (%) | Always (%) |
| <b>Southeast Asia</b>               |                       |               |                       |            |
| Bangladesh                          | 31                    | 29            | 21                    | 16         |
| Indonesia                           | 33                    | 22            | 17                    | 16         |
| Maldives                            | 41                    | 35            | 23                    | 15         |
| Myanmar                             | 24                    | 24            | 32                    | 11         |
| Sri-Lanka                           | 47                    | 42            | 42                    | 28         |
| Thailand                            | 39                    | 28            | 25                    | 24         |
| Timor                               | 29                    | 28            | 26                    | 29         |
| <b>African Region</b>               |                       |               |                       |            |
| Algeria                             | NA                    | NA            | NA                    | NA         |
| Botswana                            | 54                    | 53            | 57                    | 48         |
| Eswatini                            | 37                    | 32            | 26                    | 27         |
| Ghana                               | 48                    | 51            | 49                    | 42         |
| Kenya                               | 63                    | 58            | 59                    | 47         |
| Malawi                              | NA                    | NA            | NA                    | NA         |
| Mauritania                          | 50                    | 46            | 43                    | 35         |
| Mauritius                           | NA                    | NA            | NA                    | NA         |
| Mozambique                          | 45                    | 49            | 43                    | 37         |
| Namibia                             | 49                    | 45            | 40                    | 42         |
| Seychelles                          | 49                    | 49            | 34                    | 41         |
| Tanzania                            | 28                    | 33            | 22                    | 19         |
| Uganda                              | 50                    | 51            | 45                    | 34         |
| Zambia                              | 63                    | 58            | 72                    | 54         |
| <b>Eastern Mediterranean Region</b> |                       |               |                       |            |
| Afghanistan                         | 45                    | 52            | 46                    | 39         |
| Djibouti                            | 45                    | 47            | 51                    | 35         |
| Egypt                               | 39                    | 53            | 48                    | 37         |
| Iraq                                | 71                    | 80            | 64                    | 62         |
| Jordan                              | 33                    | 36            | 23                    | 24         |
| Kuwait                              | 55                    | 44            | 39                    | 25         |
| Libya                               | 35                    | 32            | 32                    | 19         |
| Morocco                             | 35                    | 37            | 45                    | 30         |
| Oman                                | 21                    | 18            | 18                    | 13         |
| Pakistan                            | 44                    | 44            | 41                    | 34         |
| Qatar                               | 44                    | 44            | 41                    | 34         |
| Tunisia                             | 52                    | 45            | 41                    | 25         |
| United Arab Emirates                | 36                    | 33            | 29                    | 19         |
| Yemen                               | 39                    | 36            | 23                    | 12         |
| <b>Region of the Americas</b>       |                       |               |                       |            |
| Anguilla                            | 26                    | 25            | 22                    | 17         |
| Antigua                             | 29                    | 27            | 22                    | 15         |
| Argentina                           | 29                    | 27            | 22                    | 15         |
| Bahamas                             | 27                    | 22            | 19                    | 15         |
| Barbados                            | 13                    | 12            | 11                    | 21         |
| Belize                              | 37                    | 34            | 25                    | 21         |
| Bolivia                             | 34                    | 36            | 30                    | 24         |
| British Virgin Islands              | 20                    | 17            | 18                    | 8          |
| Cayman Islands                      | 34                    | 24            | 19                    | 13         |
| Chile                               | NA                    | NA            | NA                    | NA         |
| Costa Rica                          | 25                    | 24            | 17                    | 10         |
| Curaçao                             | 37                    | 27            | 22                    | 17         |
| Dominica                            | NA                    | NA            | NA                    | NA         |
| El Salvador                         | 31                    | 29            | 19                    | 12         |
| Grenada                             | 32                    | 29            | 18                    | 24         |
| Guatemala                           |                       |               |                       |            |
| Guyana                              | 40                    | 38            | 31                    | 34         |
| Honduras                            | 39                    | 32            | 32                    | 19         |
| Jamaica                             | 43                    | 38            | 43                    | 47         |
| Montserrat                          | 20                    | 26            | 29                    | 37         |
| Peru                                | 53                    | 55            | 42                    | 34         |
| Saint Kitts and Nevis               | 25                    | 19            | 19                    | 25         |
| Saint Lucia                         | 30                    | 23            | 24                    | 25         |
| St. Vincent and the Grenadines      | 30                    | 31            | 29                    | 28         |
| Suriname                            | 34                    | 34            | 25                    | 15         |
| Trinidad and Tobago                 | 18                    | 12            | 12                    | 12         |
| Uruguay                             | 28                    | 25            | 19                    | 11         |
| <b>Western Pacific Region</b>       |                       |               |                       |            |
| Brunei Darussalam                   | 30                    | 24            | 18                    | 15         |
| Cambodia                            | NA                    | NA            | NA                    | NA         |

|                                  |    |    |    |    |
|----------------------------------|----|----|----|----|
| Cook Islands                     | 37 | 32 | 20 | 21 |
| Kiribati                         | 36 | 36 | 39 | 35 |
| Lao People's Democratic Republic | 13 | 11 | 11 | 10 |
| Malaysia                         | 26 | 18 | 14 | 13 |
| Mongolia                         | 30 | 27 | 23 | 24 |
| Nauru                            | 39 | 31 | 30 | 25 |
| Niue                             | 48 | 36 | 23 | 9  |
| Philippines                      | 53 | 50 | 45 | 41 |
| Samoa                            | 80 | 72 | 70 | 60 |
| Solomon Islands                  | 68 | 68 | 67 | 57 |
| Tokelau                          | 58 | 35 | 24 | 19 |
| Tonga                            | 59 | 59 | 46 | 37 |
| Tuvalu                           | 30 | 34 | 18 | 21 |
| Vanuatu                          | 70 | 70 | 66 | 54 |
| Vietnam                          | 32 | 26 | 19 | 17 |
| Wallis and Futuna                | 40 | 37 | 32 | 21 |
| China                            | 36 | 28 | 20 | 12 |
| <b>European Region</b>           |    |    |    |    |
| Tajikistan                       | NA | NA | NA | NA |
| Macedonia                        | 13 | 9  | 8  | 5  |

**Supplementary Table 5: Country specific prevalence by parental support**

| Country                             | Parents or guardians understood problem |               |                       |            | Parents or guardians knew about free time |               |                       |            |
|-------------------------------------|-----------------------------------------|---------------|-----------------------|------------|-------------------------------------------|---------------|-----------------------|------------|
|                                     | Never/rarely (%)                        | Sometimes (%) | Most of the times (%) | Always (%) | Never/rarely (%)                          | Sometimes (%) | Most of the times (%) | Always (%) |
| <b>Southeast Asia</b>               |                                         |               |                       |            |                                           |               |                       |            |
| Bangladesh                          | 36                                      | 21            | 22                    | 22         | 28                                        | 27            | 20                    | 23         |
| Indonesia                           | 22                                      | 20            | 20                    | 20         | 24                                        | 21            | 20                    | 17         |
| Maldives                            | 29                                      | 31            | 23                    | 18         | 31                                        | 29            | 20                    | 24         |
| Myanmar                             | 21                                      | 23            | 25                    | 18         | 27                                        | 25            | 24                    | 16         |
| Sri-Lanka                           | 43                                      | 43            | 39                    | 27         | 46                                        | 42            | 41                    | 29         |
| Thailand                            | 34                                      | 29            | 23                    | 21         | 37                                        | 31            | 22                    | 22         |
| Timor                               | 26                                      | 31            | 43                    | 29         | 26                                        | 30            | 36                    | 27         |
| <b>African Region</b>               |                                         |               |                       |            |                                           |               |                       |            |
| Algeria                             | NA                                      | NA            | NA                    | NA         | NA                                        | NA            | NA                    | NA         |
| Botswana                            | 51                                      | 58            | 53                    | 49         | 56                                        | 57            | 56                    | 43         |
| Eswatini                            | 35                                      | 36            | 33                    | 24         | 32                                        | 35            | 30                    | 29         |
| Ghana                               | 47                                      | 51            | 48                    | 47         | 48                                        | 49            | 55                    | 45         |
| Kenya                               | 57                                      | 60            | 60                    | 51         | 59                                        | 58            | 57                    | 53         |
| Malawi                              | NA                                      | NA            | NA                    | NA         | NA                                        | NA            | NA                    | NA         |
| Mauritania                          | 47                                      | 46            | 49                    | 38         | 48                                        | 47            | 47                    | 37         |
| Mauritius                           | NA                                      | NA            | NA                    | NA         | NA                                        | NA            | NA                    | NA         |
| Mozambique                          | 46                                      | 47            | 43                    | 40         | 43                                        | 50            |                       |            |
| Namibia                             | 46                                      | 50            | 43                    | 40         | 48                                        | 48            | 44                    | 38         |
| Seychelles                          | 48                                      | 47            | 42                    | 43         | 49                                        | 50            | 38                    | 44         |
| Tanzania                            | 29                                      | 36            | 21                    | 18         | 28                                        | 32            | 22                    | 21         |
| Uganda                              | 46                                      | 50            | 46                    | 38         | 45                                        | 49            | 49                    | 38         |
| Zambia                              | 66                                      | 61            | 64                    | 50         | 65                                        | 59            | 68                    | 52         |
| <b>Eastern Mediterranean Region</b> |                                         |               |                       |            |                                           |               |                       |            |
| Afghanistan                         | 46                                      | 52            | 48                    | 37         | 45                                        | 50            | 50                    | 40         |
| Djibouti                            | 50                                      | 59            | 40                    | 30         | 48                                        | 51            | 47                    | 31         |
| Egypt                               | 41                                      | 48            | 52                    | 34         | 43                                        | 46            | 47                    | 36         |
| Iraq                                | 72                                      | 68            | 68                    | 63         | 69                                        | 69            | 69                    | 67         |
| Jordan                              | 33                                      | 30            | 29                    | 23         | 33                                        | 32            | 30                    | 23         |
| Kuwait                              | 46                                      | 50            | 40                    | 31         | 48                                        | 45            | 46                    | 31         |
| Libya                               | 34                                      | 34            | 27                    | 21         | 36                                        | 34            | 27                    | 22         |
| Morocco                             | 35                                      | 37            | 44                    | 29         | 35                                        | 40            | 40                    | 31         |
| Oman                                | 20                                      | 20            | 17                    | 14         | 20                                        | 26            | 20                    | 13         |
| Pakistan                            | 43                                      | 47            | 46                    | 36         | 42                                        | 44            | 47                    | 36         |
| Qatar                               | 43                                      | 47            | 46                    | 36         | 42                                        | 44            | 47                    | 36         |
| Tunisia                             | 39                                      | 50            | 50                    | 36         | 41                                        | 44            | 38                    | 36         |
| United Arab Emirates                | 34                                      | 31            | 31                    | 25         | 32                                        | 35            | 35                    | 27         |
| Yemen                               | 28                                      | 27            | 23                    | 15         | 28                                        | 27            | 22                    | 16         |
| <b>Region of the Americas</b>       |                                         |               |                       |            |                                           |               |                       |            |
| Anguilla                            | 24                                      | 27            | 25                    | 19         | 24                                        | 24            | 29                    | 22         |
| Antigua                             | 26                                      | 30            | 23                    | 17         | 28                                        | 28            | 24                    | 18         |
| Argentina                           | 26                                      | 30            | 23                    | 17         | 28                                        | 28            | 24                    | 18         |



Bahamas

28

25

13

18

28

26

25

14

---

|                                     |    |    |    |    |    |    |    |    |
|-------------------------------------|----|----|----|----|----|----|----|----|
| Barbados                            | 14 | 12 | 9  | 10 | 12 | 15 | 14 | 11 |
| Belize                              | 32 | 39 | 28 | 24 | 35 | 36 | 30 | 24 |
| Bolivia                             | 34 | 36 | 27 | 23 | 36 | 34 | 28 | 23 |
| British Virgin Islands              | 19 | 20 | 17 | 15 | 19 | 18 | 18 | 17 |
| Cayman Islands                      | 30 | 24 | 20 | 18 | 28 | 29 | 22 | 21 |
| Chile                               | NA |
| Costa Rica                          | 23 | 20 | 19 | 13 | 22 | 23 | 23 | 12 |
| Curaçao                             | 34 | 31 | 25 | 21 | 34 | 31 | 25 | 23 |
| Dominica                            | NA |
| El Salvador                         | 28 | 25 | 20 | 15 | 30 | 25 | 25 | 14 |
| Grenada                             | 28 | 37 | 26 | 24 | 31 | 29 | 25 | 27 |
| Guatemala                           |    |    |    |    |    |    |    |    |
| Guyana                              | 37 | 41 | 38 | 30 | 40 | 40 | 34 | 31 |
| Honduras                            | 40 | 31 | 34 | 19 | 39 | 41 | 33 | 22 |
| Jamaica                             | 36 | 44 | 49 | 39 | 42 | 46 | 46 | 30 |
| Montserrat                          | 18 | 32 | 34 | 25 | 21 | 37 | 29 | 21 |
| Peru                                | 52 | 50 | 43 | 38 | 51 | 52 | 45 | 38 |
| Saint Kitts and Nevis               | 23 | 21 | 22 | 18 | 24 | 22 | 22 | 16 |
| Saint Lucia                         | 27 | 32 | 23 | 20 | 25 | 30 | 26 | 23 |
| St. Vincent and the<br>Grenadines   | 29 | 34 | 37 | 27 | 27 | 35 | 33 | 27 |
| Suriname                            | 31 | 30 | 23 | 22 | 32 | 32 | 28 | 19 |
| Trinidad and Tobago                 | 15 | 16 | 15 | 12 | 16 | 16 | 18 | 10 |
| Uruguay                             | 23 | 22 | 19 | 14 | 22 | 24 | 19 | 15 |
| <b>Western Pacific Region</b>       |    |    |    |    |    |    |    |    |
| Brunei Darussalam                   | 22 | 19 | 19 | 20 | 26 | 20 | 15 | 19 |
| Cambodia                            | NA |
| Cook Islands                        | 25 | 35 | 27 | 12 | 34 | 28 | 27 | 12 |
| Kiribati                            | 30 | 45 | 47 | 39 | 35 | 40 | 40 | 28 |
| Lao People's Democratic<br>Republic | 13 | 11 | 12 | 9  | 13 | 13 | 10 | 8  |
| Malaysia                            | 20 | 17 | 15 | 15 | 22 | 18 | 16 | 14 |
| Mongolia                            | 32 | 26 | 24 | 22 | 31 | 30 | 27 | 24 |
| Nauru                               | 32 | 32 | 35 | 37 | 37 | 34 | 22 | 29 |
| Niue                                | 26 | 34 | 32 | 42 | 43 | 24 | 21 | 17 |
| Philippines                         | 51 | 52 | 47 | 41 | 53 | 51 | 46 | 40 |
| Samoa                               | 76 | 73 | 74 | 62 | 77 | 74 | 72 | 58 |
| Solomon Islands                     | 68 | 66 | 65 | 65 | 69 | 69 | 68 | 51 |
| Tokelau                             | 36 | 44 | 7  | 31 | 39 | 51 | 25 | 9  |
| Tonga                               | 45 | 58 | 60 | 49 | 47 | 63 | 57 | 42 |
| Tuvalu                              | 25 | 30 | 39 | 22 | 26 | 28 | 26 | 27 |
| Vanuatu                             | 66 | 73 | 56 | 57 | 63 | 73 | 76 | 50 |
| Vietnam                             | 26 | 25 | 20 | 18 | 27 | 25 | 19 | 19 |
| Wallis and Futuna                   | 34 | 30 | 25 | 24 | 35 | 28 | 31 | 23 |
| China                               | 31 | 25 | 18 | 14 | 31 | 24 | 21 | 15 |
| <b>European Region</b>              |    |    |    |    |    |    |    |    |
| Tajikistan                          | NA |
| Macedonia                           | 14 | 10 | 12 | 7  | 13 | 10 | 12 | 7  |

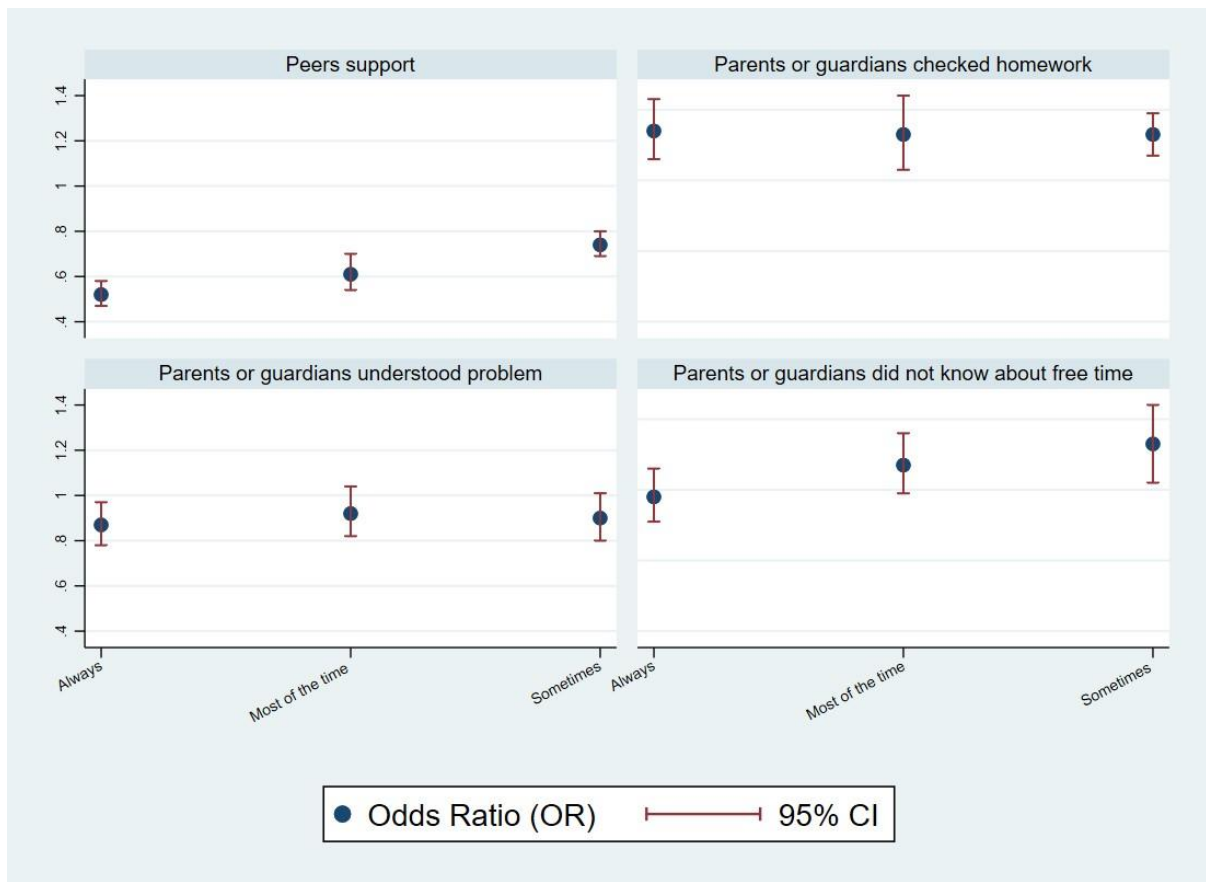

**Supplementary figure-1: Association of bullying to peer and parental support.**
